# Supplementary material for: Technical Note: A Technique to Convert NO 2 to NO 2 – with S(IV) and its Application to Measuring Nitrate Photolysis
Source: Copernicus journal article supplement (doi:10.5194/egusphere-2023-2876), 2023-12-04
Supplement: Supplementary file 1 [file egusphere-2023-2876-supplement.pdf]

**Technical Note: A Technique to Convert NO<sub>2</sub> to NO<sub>2</sub><sup>-</sup> with S(IV)  
and its Application to Measuring Nitrate Photolysis**

5

**Supporting Information**

*Aaron Lieberman, Julietta Picco, Murat Onder, and Cort Anastasio\**

10

Department of Land, Air, and Water Resources, University of California - Davis  
Davis, California 95616, United States

\*Corresponding author: Cort Anastasio ([canastasio@ucdavis.edu](mailto:canastasio@ucdavis.edu))

15

## Table of Contents

|    |                                                                                                                              |     |
|----|------------------------------------------------------------------------------------------------------------------------------|-----|
|    | Section S1. Materials and Solution Preparation.....                                                                          | S3  |
| 20 | Section S2. Adapting the Griess Method for the Presence of Sulfite .....                                                     | S3  |
|    | Figure S1. Impact of S(IV) and S(VI) on the determination of nitrite.....                                                    | S5  |
|    | Figure S2. Impact of S(IV) on the NO <sub>2</sub> <sup>-</sup> calibration curve .....                                       | S6  |
|    | Figure S3. Impact of •OH scavengers on $\phi(\text{NO}_2^-)$ .....                                                           | S7  |
|    | Figure S4. Comparing the addition of S(IV) before and after illumination.....                                                | S8  |
| 25 | Table S1. Summary of literature values of $\Phi(\text{NO}_2^-)$ and $\Phi(\text{NO}_2)$ from aqueous nitrate photolysis..... | S9  |
|    | Table S2. Conditions and $\phi(\text{NO}_2^-)_{\text{S(IV)}}$ measurements for experiments in Figures 1 and 2.....           | S10 |

## Section S1. Materials and Solution Preparation

30 Sodium nitrate (ACS grade), sodium sulfite (ACS grade), 2-propanol (ACS plus grade), potassium phosphate monobasic (ACS grade), sodium hydroxide (ACS grade), and hydrochloric acid (trace metal grade) were purchased from Fisher Scientific. Sodium nitrite (99.9995%) was purchased from Thermos Scientific. Sulfanilamide (99%), N-(1-naphthyl)ethylenediamine dihydrochloride (NED) (reagent grade), and hydrogen peroxide ( $\text{H}_2\text{O}_2$ ) (30% solution) were purchased from Sigma Aldrich.

35 All solutions were prepared with water from a Milli-Q (MQ) Advantage A10 system (18.2  $\text{M}\Omega$  cm) with an upstream carbon cartridge (Barnstead) that kept TOC < 5 ppb. Illumination solutions were prepared with 50  $\mu\text{M}$  sodium nitrate, 50  $\mu\text{M}$  2-propanol (as an  $\bullet\text{OH}$  scavenger) and varying concentrations of sodium sulfite. The illumination solutions were either prepared in MQ water or in a pH 8 phosphate buffer (0.010 M potassium phosphate monobasic in MQ water) where the pH was adjusted with sodium hydroxide or hydrochloric acid.

40 Standards were prepared with sodium nitrite and contained the same concentration of S(IV) as the illumination solution. The Griess color development method was performed with either: (1) 25  $\mu\text{L}$  of 1% (w/v) sulfanilamide in 10% (v/v) HCl/MQ solution and 25  $\mu\text{L}$  of 0.1% (w/v) NED solution or (2) 50  $\mu\text{L}$  of 1% (w/v) sulfanilamide in 30% (v/v) HCl/MQ and 50  $\mu\text{L}$  of 0.1% (w/v) NED solution if the solution contained sulfite. Hydrogen peroxide was added to convert S(IV) to S(VI) in the reaction solutions and nitrite standards. Since  $\text{H}_2\text{O}_2$  in the stock solution slowly decays, we monitored the concentration daily with a Shimadzu UV-2501PC spectrophotometer by monitoring the absorbance at 240 nm and using the base-10 molar absorption coefficient of  $38.1 \text{ M}^{-1} \text{ cm}^{-1}$  (Miller and Kester, 1988). The Dionex check standard was made from the Dionex Combined Seven Anion Standard II diluted to 100-130 nM  $\text{NO}_2^-$ .

45 Illumination solutions were prepared from stock solutions of 0.10 M sodium nitrate, 0.10 M 2-propanol and 50 0.033 M sodium sulfite. The stock solutions of sodium nitrate and 2-propanol were prepared biannually and stored in amber bottles in a refrigerator. Both the sodium sulfite solutions and sodium nitrite standard curve standards were made fresh daily from their respective salt. The sulfanilamide and NED solutions were prepared monthly.

## Section S2. Adapting the Griess Method for the Presence of Sulfite

55 A major problem with using S(IV) to convert  $\text{NO}_2$  to  $\text{NO}_2^-$  is that S(IV) not only reacts with  $\text{NO}_2$ , but also other chemicals in solution. As shown in Figure S1, the addition of S(IV) to nitrite standards inhibits the Griess method of analysis by preventing the formation of the azo-dye, rendering spectroscopic analysis impossible. In contrast, sulfate, i.e., S(VI), does not interfere with the analysis of nitrite (Fig. S1). Therefore, oxidizing S(IV) to S(VI) after the conversion of  $\text{NO}_2$  to  $\text{NO}_2^-$  but prior to the addition of the sulfanilamide reagent should allow us to accurately measure both nitrite and nitrogen dioxide production. We tried two different methods of oxidation: 60 bubbling air into the solution and adding  $\text{H}_2\text{O}_2$ . Although bubbling air reduces the interference of S(IV) on nitrite determination, the relative standard error across replicate 100 nM  $\text{NO}_2^-$  standards is large (34%), and therefore this is not an appropriate method. In contrast, adding  $\text{H}_2\text{O}_2$  to standard curve solutions containing S(IV) prior to the start of the Griess analysis effectively reduces the interference of S(IV) on nitrite measurements. The nitrite calibration

65 curve regression line is linear and the 100 nM  $\text{NO}_2^-$  replicates are within 3% of each other. Therefore, we are able to measure nitrite in the presence of S(IV) by oxidizing the S(IV) to S(VI) with  $\text{H}_2\text{O}_2$ .

We then tested how the molar ratio of  $\text{H}_2\text{O}_2$ :S(IV) impacts both the linearity of the standard curve and the relative error among replicate standards. We tested molar ratios of 0.5:1, 1:1, 2:1, and 3:1  $\text{H}_2\text{O}_2$ :S(IV). Both the 1:1 and 2:1 ratio standard curves have an  $R^2$  greater than 0.99 while the corresponding values for the 0.5:1 and 3:1 ratio standard curves were less than 0.98. The 2:1 ratio provided triplicate 100 nM standard measurements that are within 5% of the true value and each other, while the 1:1 ratio 100 nM standard triplicates are within 15% of each other and the true value. Based on the excellent calibration curve linearity and replicate reproducibility, we use a 2:1 molar ratio of  $\text{H}_2\text{O}_2$ :S(IV).

We find that the nitrite signal in the presence of S(IV) and  $\text{H}_2\text{O}_2$  is time sensitive, decaying by approximately 15% over the course of ~40 minutes after the addition of the NED solution. After this time, the error in the replicate standard and check standard are both greater than 10%, while after 4 hours there is no nitrite signal. We resolved this problem by immediately starting the UV-VIS analysis after waiting the necessary 10 minutes post NED addition, and by collecting all the UV-VIS spectra for a given set of samples within 20 minutes of recording the first sample spectrum. We also test both a 100 nM  $\text{NO}_2^-$  replicate standard and the Dionex check at the start and end of each batch of 8-10 samples to ensure that the signal does not change more than 10% throughout the analysis.

As shown in Figure S2, as the S(IV) concentration increases, the slope of the nitrite calibration curve regression line decreases. This could either be because of higher  $\text{H}_2\text{O}_2$  (since we maintained a  $\text{H}_2\text{O}_2$ :S(IV) ratio of 2:1) or because of higher residual S(IV) after  $\text{H}_2\text{O}_2$  addition. Although we are unsure whether S(IV),  $\text{H}_2\text{O}_2$ , or both are reacting with the sulfanilamide and/or NED reagents, we found that doubling the volume of the sulfanilamide and NED added to the samples produces a more linear calibration curve. Because of the impact of S(IV) on the nitrite response, the calibration curve on a given day needs to contain the same S(IV) and  $\text{H}_2\text{O}_2$  concentrations as the experimental solutions. With this procedure, the Dionex check standard and standard replicate give nitrite concentrations within 15% of their actual values, indicating that we can correct for the impacts of S(IV) and  $\text{H}_2\text{O}_2$  on the nitrite response. However, the interference from S(IV) could be a problem at higher concentrations if the nitrite calibration curve becomes so flat that the regression line loses the required resolution for nitrite analysis.

Our final adaptation to the standard Griess method of analysis is in response to the effect of S(IV) on pH. The reaction of nitrite with Griess reagents to form the light-absorbing azo dye requires a pH below 2. Since the addition of 1.5 mM of  $\text{Na}_2\text{SO}_3$  prevented the solution from becoming that acidic, we increased the acidity of the sulfanilamide solution from 10% to 30% hydrochloric acid, as recommend by Doane and Horwath (2003).

95

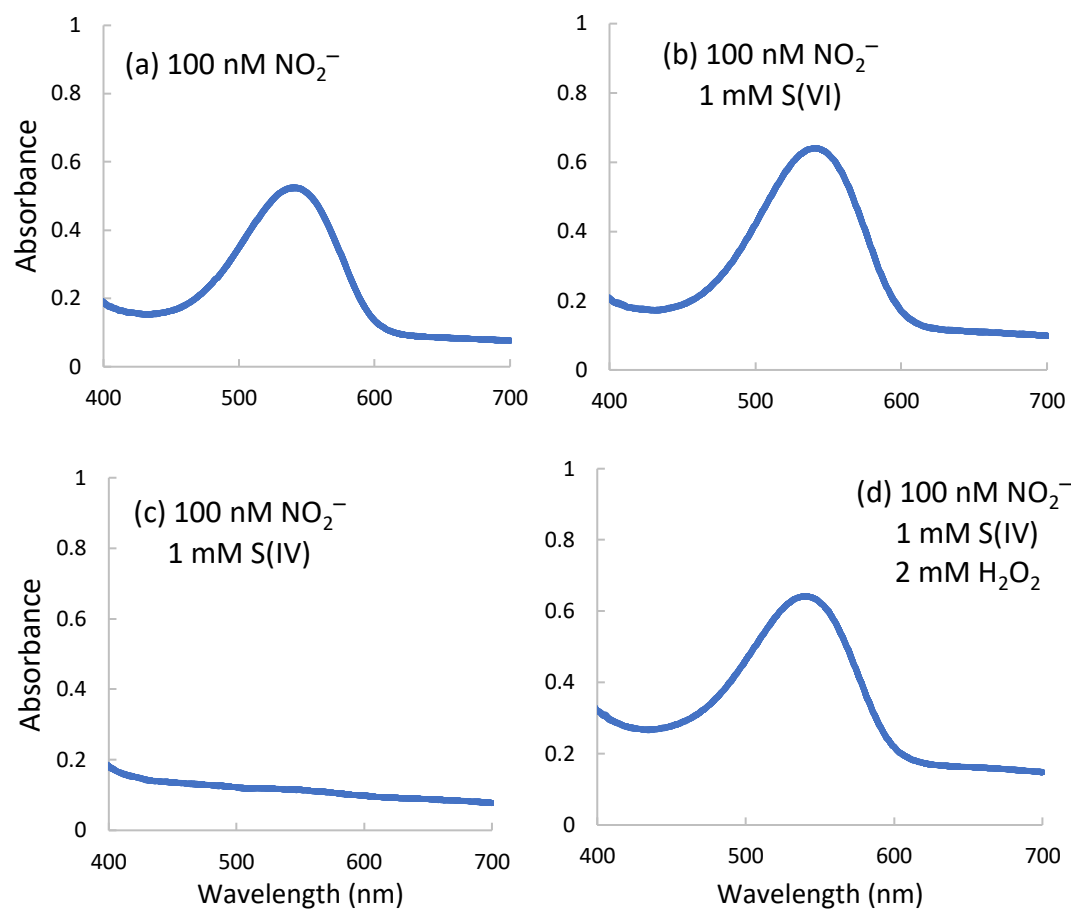

100

105

**Figure S1.** UV-VIS spectra for (a) 100 nM NO<sub>2</sub><sup>-</sup>, (b) 100 nM NO<sub>2</sub><sup>-</sup> and 1.0 mM sulfate (S(VI)), (c) 100 nM NO<sub>2</sub><sup>-</sup> and 1.0 mM sulfite (S(IV)) and (d) 100 nM NO<sub>2</sub><sup>-</sup>, 1.0 mM S(IV), and 2.0 mM H<sub>2</sub>O<sub>2</sub>. For panels (b) and (c), the sulfanilamide solution was added to start the Griess method of analysis within 5 and 10 minutes, respectively, after the preparation of the NO<sub>2</sub><sup>-</sup> and S(VI) solution. For panel (d), the H<sub>2</sub>O<sub>2</sub> was added within 3 min after the NO<sub>2</sub><sup>-</sup> and sulfite solution was prepared, and the sulfanilamide reagent was added within 3 minutes after that.

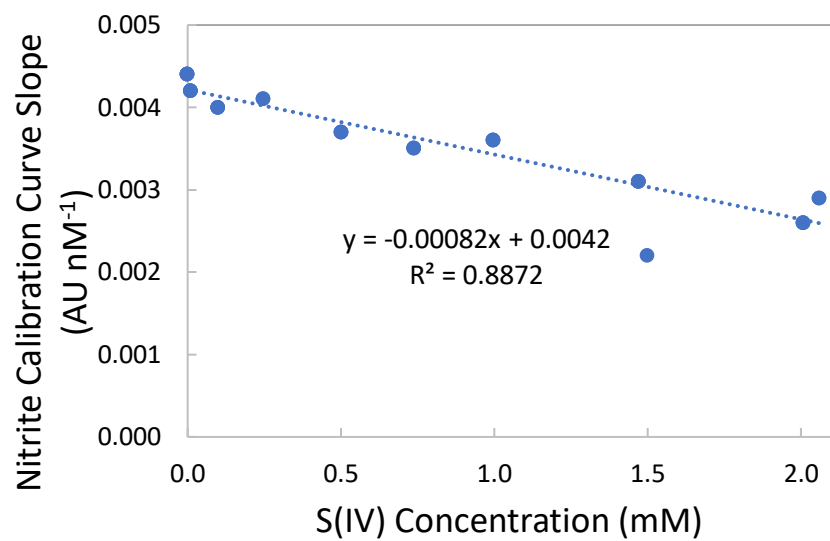

**Figure S2.** Impact of S(IV) concentration on the slope of the nitrite calibration curve. Each standard contained nitrite, the stated concentration of S(IV), and H<sub>2</sub>O<sub>2</sub> at twice the S(IV) concentration.

110

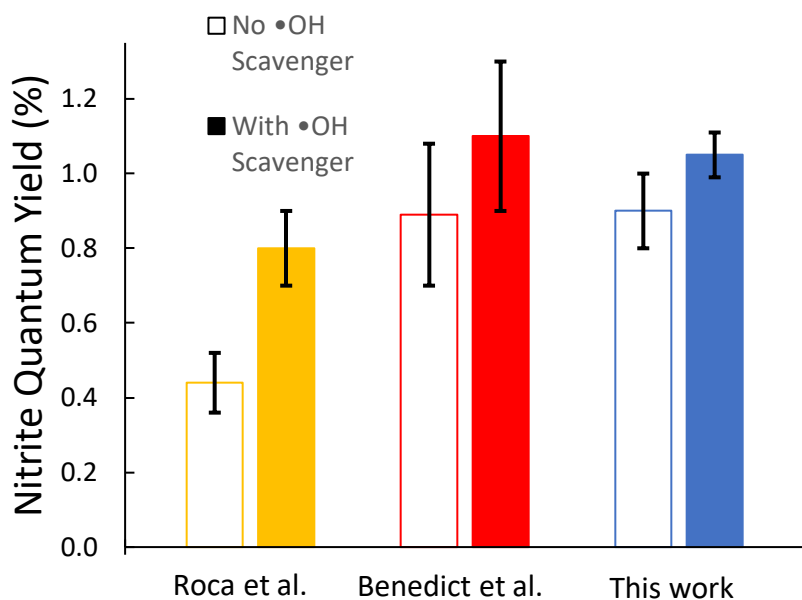

115 **Figure S3.** Influence of  $\cdot\text{OH}$  scavenger on the nitrite quantum yield. Data are from: Roca et al. (2008) (yellow bars: 310 nm, 298 K, pH 4, 10 mM  $\text{NO}_3^-$ ; no formate (hollow bar) or 10 mM formate (solid bar)); Benedict et al. (2017b) (red bars: 313 nm, 298 K, pH < 5, 50  $\mu\text{M}$   $\text{NO}_3^-$ ; no formate or cysteine (hollow bar) and with 50  $\mu\text{M}$  formate or cysteine (solid bar)); and this work (blue bars: 313 nm, 293 K, pH 5, 50  $\mu\text{M}$   $\text{NO}_3^-$ ; no 2-propanol (hollow) or 50  $\mu\text{M}$  2-propanol (solid)). Error bars are  $\pm 1 \sigma$  for this work and Benedict et al., while the error bar for Roca et al. is their  
 120 unspecified reported error.

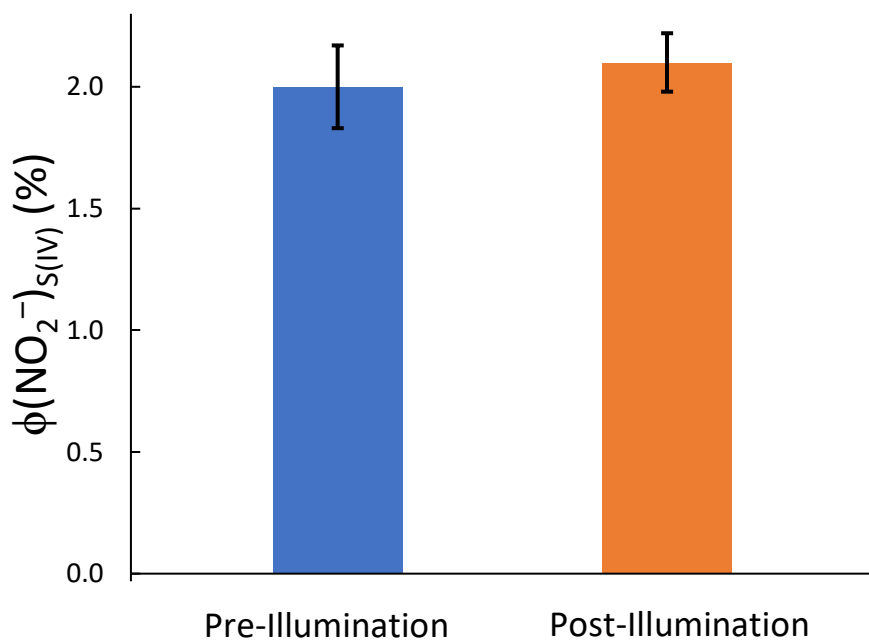

125 **Figure S4.** Comparison of the quantum yield for nitrite in the presence of S(IV) under two experimental conditions: (1) “Pre-Illumination”, where 1.5 mM S(IV) was added to the solution prior to illumination or (2) “Post-Illumination”, where 1.5 mM S(IV) was added after illumination. The quantum yields for the two conditions,  $(2.00 \pm 0.14)\%$  and  $(2.10 \pm 0.08)\%$ , respectively, are not statistically different ( $p = 0.16$ ).

130



**Table S1.** Summary of literature values of  $\Phi(\text{NO}_2^-)$  and  $\Phi(\text{NO}_2)$  from aqueous nitrate photolysis

| Study                                                                                                                          | Wavelength (nm) | Experiment Temp. (K) | Nitrate Concentration ( $\mu\text{M}$ ) | Measured Quantum Yield | Quantum Yield at 293 K <sup>a</sup> |
|--------------------------------------------------------------------------------------------------------------------------------|-----------------|----------------------|-----------------------------------------|------------------------|-------------------------------------|
| <i>Determinations of hydroxyl radical quantum yields (channel 1)</i>                                                           |                 |                      |                                         |                        |                                     |
| Zepp et al. (1987)                                                                                                             | 313             | 293                  | 200-4000                                | 1.30%                  | 1.30%                               |
| Warneck & Wurzinger (1988)                                                                                                     | 305             | 295                  | 10,000                                  | 0.92%                  | 0.80%                               |
| Zellner et al. (1990)                                                                                                          | 308             | 298                  | 3000                                    | 1.70%                  | 1.50%                               |
| Chu and Anastasio (2003)                                                                                                       | 313             | 298                  | 200                                     | 1.33%                  | 1.20%                               |
| Average ( $\pm 1 \sigma$ ) $\phi(^{\bullet}\text{OH}) = 1.19 \pm 0.29\%$                                                       |                 |                      |                                         |                        |                                     |
| <i>Determinations of nitrite quantum yields from studies that used <math>^{\bullet}\text{OH}</math> scavengers (channel 2)</i> |                 |                      |                                         |                        |                                     |
| Warneck & Wurzinger (1988)                                                                                                     | 305             | 295                  | 10,000                                  | 1.04%                  | 1.01%                               |
| Goldstein & Rabani (2007)                                                                                                      | 300             | 297                  | 20,000-100,000                          | 0.94%                  | 0.88%                               |
| Roca et al. (2008)                                                                                                             | 310             | 298                  | 10,000                                  | 0.80%                  | 0.74%                               |
| Benedict et al. (2017a)                                                                                                        | 313             | 293                  | 50                                      | 1.14%                  | 1.14%                               |
| Benedict et al. (2017b)                                                                                                        | 313             | 298                  | 50                                      | 1.10%                  | 1.02%                               |
| McFall et al. (2018)                                                                                                           | 313             | 298                  | 50                                      | 0.93%                  | 0.86%                               |
| Average ( $\pm 1 \sigma$ ) $\phi(\text{NO}_2^-) = 0.98 \pm 0.11\%$                                                             |                 |                      |                                         |                        |                                     |
| Average ( $\pm 1 \sigma$ ) $(\phi(\text{NO}_2^-) + \phi(^{\bullet}\text{OH})) = 2.17 \pm 0.52\%$                               |                 |                      |                                         |                        |                                     |

<sup>a</sup> Quantum yields not measured at 293 K were adjusted to this temperature with the Arrhenius equation using the activation energies from Chu et al. (2003), 20 kJ/mol, and Benedict et al. (2017b), 11 kJ/mol, for  $\phi(^{\bullet}\text{OH})$  and  $\phi(\text{NO}_2^-)$ , respectively.

**Table S2.** Conditions and  $\phi(\text{NO}_2^-)_{\text{S(IV)}}$  measurements for experiments in Figures 1 and 2. All illuminations were performed with 50  $\mu\text{M}$   $\text{NaNO}_3$ , 313 nm illumination, and a temperature of 293 K.

| Expt # | 2-Propanol Concentration ( $\mu\text{M}$ ) | S(IV) Concentration ( $\mu\text{M}$ ) | Pre- or Post-Illumination S(IV) Addition | pH  | $j_{2\text{NB}}$ ( $\text{s}^{-1}$ ) | $\phi(\text{NO}_2^-)$ or $\phi(\text{NO}_2^-)_{\text{S(IV)}}$ (%) |
|--------|--------------------------------------------|---------------------------------------|------------------------------------------|-----|--------------------------------------|-------------------------------------------------------------------|
| 1      | 0                                          | 0                                     | N/A                                      | 4.9 | 0.0448                               | 1.05                                                              |
| 2      | 0                                          | 0                                     | N/A                                      | 4.9 | 0.0448                               | 0.94                                                              |
| 3      | 0                                          | 0                                     | N/A                                      | 4.9 | 0.0448                               | 0.92                                                              |
| 4      | 0                                          | 0                                     | N/A                                      | 4.8 | 0.0469                               | 0.79                                                              |
| 5      | 0                                          | 0                                     | N/A                                      | 4.8 | 0.0469                               | 0.82                                                              |
| 6      | 50                                         | 0                                     | N/A                                      | 5.0 | 0.0485                               | 1.13                                                              |
| 7      | 50                                         | 0                                     | N/A                                      | 4.9 | 0.0489                               | 1.04                                                              |
| 8      | 50                                         | 0                                     | N/A                                      | 4.9 | 0.0489                               | 1.07                                                              |
| 9      | 50                                         | 0                                     | N/A                                      | 4.9 | 0.0489                               | 0.96                                                              |
| 10     | 50                                         | 10                                    | Pre                                      | 7.0 | 0.0415                               | 1.21                                                              |
| 11     | 50                                         | 10                                    | Pre                                      | 7.0 | 0.0415                               | 1.49                                                              |
| 12     | 50                                         | 10                                    | Pre                                      | 7.0 | 0.0415                               | 1.38                                                              |
| 13     | 50                                         | 100                                   | Pre                                      | 7.8 | 0.0414                               | 1.87                                                              |
| 14     | 50                                         | 100                                   | Pre                                      | 7.8 | 0.0414                               | 1.53                                                              |
| 15     | 50                                         | 100                                   | Pre                                      | 7.8 | 0.0414                               | 1.84                                                              |
| 16     | 50                                         | 250                                   | Pre                                      | 8.2 | 0.0423                               | 1.87                                                              |
| 17     | 50                                         | 250                                   | Pre                                      | 8.2 | 0.0423                               | 1.55                                                              |
| 18     | 50                                         | 500                                   | Pre                                      | 8.3 | 0.0403                               | 2.08                                                              |
| 19     | 50                                         | 500                                   | Pre                                      | 8.3 | 0.0403                               | 1.79                                                              |
| 20     | 50                                         | 500                                   | Pre                                      | 8.3 | 0.0403                               | 2.00                                                              |
| 21     | 50                                         | 750                                   | Pre                                      | 8.3 | 0.0215                               | 2.03                                                              |
| 22     | 50                                         | 750                                   | Pre                                      | 8.3 | 0.0215                               | 1.93                                                              |
| 23     | 50                                         | 750                                   | Pre                                      | 8.3 | 0.0215                               | 2.30                                                              |
| 24     | 50                                         | 1000                                  | Pre                                      | 8.2 | 0.0427                               | 1.90                                                              |

|    |    |      |      |     |        |      |
|----|----|------|------|-----|--------|------|
| 25 | 50 | 1000 | Pre  | 8.2 | 0.0427 | 2.00 |
| 26 | 50 | 1000 | Pre  | 8.2 | 0.0427 | 2.00 |
| 27 | 50 | 1500 | Pre  | 8.6 | 0.0471 | 2.10 |
| 28 | 50 | 1500 | Pre  | 8.6 | 0.0471 | 2.07 |
| 29 | 50 | 1500 | Pre  | 8.6 | 0.0471 | 2.11 |
| 30 | 50 | 1500 | Pre  | 8.6 | 0.0471 | 1.81 |
| 31 | 50 | 2000 | Pre  | 8.6 | 0.0403 | 2.00 |
| 32 | 50 | 2000 | Pre  | 8.6 | 0.0403 | 2.02 |
| 33 | 50 | 2000 | Pre  | 8.6 | 0.0403 | 2.06 |
| 34 | 50 | 1500 | Post | 5.1 | 0.0489 | 2.09 |
| 35 | 50 | 1500 | Post | 5.1 | 0.0371 | 2.18 |
| 36 | 50 | 1500 | Post | 5.0 | 0.0494 | 2.03 |
| 36 | 0  | 1500 | Post | 5.1 | 0.0425 | 2.23 |
| 37 | 0  | 1500 | Post | 5.1 | 0.0399 | 2.13 |
| 38 | 0  | 1500 | Post | 5.0 | 0.0457 | 1.92 |

## References

- Benedict, K. B. and Anastasio, C.: Quantum Yields of Nitrite ( $\text{NO}_2^-$ ) from the Photolysis of Nitrate ( $\text{NO}_3^-$ ) in Ice at 313 nm, *J. Phys. Chem. A*, 121, 8474–8483, <https://doi.org/10.1021/acs.jpca.7b08839>, 2017.
- Benedict, K. B., McFall, A. S., and Anastasio, C.: Quantum Yield of Nitrite from the Photolysis of Aqueous Nitrate above 300 nm, *Environ. Sci. Technol.*, 51, 4387–4395, <https://doi.org/10.1021/acs.est.6b06370>, 2017.
- Chu, L. and Anastasio, C.: Quantum Yields of Hydroxyl Radical and Nitrogen Dioxide from the Photolysis of Nitrate on Ice, *J. Phys. Chem. A*, 107, 9594–9602, <https://doi.org/10.1021/jp0349132>, 2003.
- Doane, T. A. and Horwath, W. R.: Spectrophotometric Determination of Nitrate with a Single Reagent, *Analytical Letters*, 36, 2713–2722, <https://doi.org/10.1081/AL-120024647>, 2003.
- Goldstein, S. and Rabani, J.: Mechanism of Nitrite Formation by Nitrate Photolysis in Aqueous Solutions: The Role of Peroxynitrite, Nitrogen Dioxide, and Hydroxyl Radical, *J. Am. Chem. Soc.*, 129, 10597–10601, <https://doi.org/10.1021/ja073609+>, 2007.
- McFall, A. S., Edwards, K. C., and Anastasio, C.: Nitrate Photochemistry at the Air–Ice Interface and in Other Ice Reservoirs, *Environ. Sci. Technol.*, 52, 5710–5717, <https://doi.org/10.1021/acs.est.8b00095>, 2018.
- Miller, W. L. and Kester, D. R.: Hydrogen peroxide measurement in seawater by (p-hydroxyphenyl)acetic acid dimerization, *Anal. Chem.*, 60, 2711–2715, <https://doi.org/10.1021/ac00175a014>, 1988.
- Roca, M., Zahardis, J., Bone, J., El-Maazawi, M., and Grassian, V. H.: 310 nm Irradiation of Atmospherically Relevant Concentrated Aqueous Nitrate Solutions: Nitrite Production and Quantum Yields, *J. Phys. Chem. A*, 112, 13275–13281, <https://doi.org/10.1021/jp809017b>, 2008.
- Warneck, P. and Wurzinger, C.: Product quantum yields for the 305-nm photodecomposition of nitrate in aqueous solution, *J. Phys. Chem.*, 92, 6278–6283, <https://doi.org/10.1021/j100333a022>, 1988.
- Zellner, R., Exner, M., and Herrmann, H.: Absolute OH quantum yields in the laser photolysis of nitrate, nitrite and dissolved  $\text{H}_2\text{O}_2$  at 308 and 351 nm in the temperature range 278–353 K, *J Atmos Chem*, 10, 411–425, <https://doi.org/10.1007/BF00115783>, 1990.
- Zepp, R. G., Hoigné, J., and Bader, H.: Nitrate-induced photooxidation of trace organic chemicals in water, *Environ. Sci. Technol.*, 21, 443–450, <https://doi.org/10.1021/es00159a004>, 1987.
